# Supplementary material for: Radiometric flight results from the HyperSpectral Imager for ClimateScience (HySICS)
Source: Copernicus journal article supplement (doi:10.5194/gi-2016-37), 2016-12-16

Measured spectrum  
& Ar Spectrum (green)

Spatial (pixels)

Expected spectrum

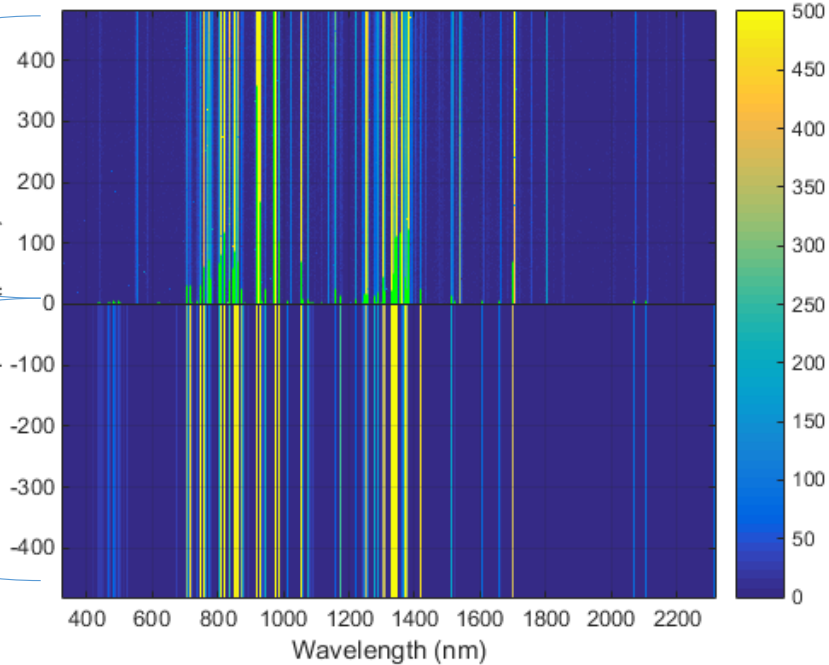

Supplement: Supplementary file [file gi-2016-37-AC1-supplement.pdf]
